# Supplementary material
Source: PubMed Central journal article supplement (PMC8176461)
Supplement: NIHMS1645148-supplement-Supplementary_Table_1.pdf [file NIHMS1645148-supplement-Supplementary_Table_1.pdf]

# THE LANCET Neurology

## Supplementary appendix

This appendix formed part of the original submission and has been peer reviewed. We post it as supplied by the authors.

Supplement to: Andrews SJ, Fulton-Howard B, Goate A. Interpretation of risk loci from genome-wide association studies of Alzheimer's disease. *Lancet Neurol* 2020; published online Jan 24. [http://dx.doi.org/10.1016/S1474-4422\(19\)30435-1](http://dx.doi.org/10.1016/S1474-4422(19)30435-1).

Table 1: AD associated loci from recent GWAS

| Locus    | Study | rsID        | chr:pos:ref:alt | LD |
|----------|-------|-------------|-----------------|----|
| 1q23.3   | J 19  | rs4575098   | 1:161155392:G:A | ◆  |
|          | L 13  | rs6656401   | 1:207692049:A:G | ◆  |
| 1q32.2   | M 18  | rs6656401   | 1:207692049:A:G | ◆  |
|          | J 19  | rs2093760   | 1:207786828:A:G | ◆  |
|          | K 19  | rs4844610   | 1:207802552:A:C | ◆  |
|          | J 19  | rs4663105   | 2:127891427:A:C | ◆  |
| 2q14.3   | L 13  | rs6733839   | 2:127892810:C:T | ◆  |
|          | M 18  | rs6733839   | 2:127892810:C:T | ◆  |
|          | K 19  | rs6733839   | 2:127892810:C:T | ◆  |
|          | J 19  | rs10933431  | 2:233981912:G:C | ◆  |
| 2q37.1   | K 19  | rs10933431  | 2:233981912:G:C | ◆  |
|          | L 13  | rs35349669  | 2:234068476:C:T | ◆  |
|          | M 18  | rs35349669  | 2:234068476:C:T | ◆  |
|          | J 19  | rs184384746 | 3:57226150:C:T  | ◆  |
| 3p14.3   | J 19  | rs6448453   | 4:11026028:A:G  | ◆  |
| 4p16.1   | L 13  | rs190982    | 5:88223420:G:A  | ◆  |
| 5q14.3   | M 18  | rs34855541  | 6:32559825:A:G  | ◆  |
|          | K 19  | rs9271058   | 6:32575406:A:T  | ◆  |
|          | L 13  | rs111418223 | 6:32578530:C:A  | ◆  |
|          | J 19  | rs6931277   | 6:32583357:A:T  | ◆  |
| 6p21.32  | J 19  | rs187370608 | 6:40942196:G:A  | ◆  |
|          | K 19  | rs114812713 | 6:41034000:G:C  | ◆  |
|          | M 18  | rs9381040   | 6:41154650:C:T  | ◆  |
|          | K 19  | rs9473117   | 6:47431284:A:C  | ◆  |
| 6p12.3   | M 18  | rs9381563   | 6:47432637:C:T  | ◆  |
|          | J 19  | rs9381563   | 6:47432637:C:T  | ◆  |
|          | L 13  | rs10948363  | 6:47487762:A:G  | ◆  |
|          | L 13  | rs2718058   | 7:37841534:A:G  | ◆  |
| 7p14.1   | J 19  | rs1859788   | 7:99971834:A:G  | ◆  |
| 7q22.1   | L 13  | rs1476679   | 7:100004446:C:T | ◆  |
|          | M 18  | rs1476679   | 7:100004446:C:T | ◆  |
|          | K 19  | rs12539172  | 7:100091795:T:C | ◆  |
|          | M 18  | rs10808026  | 7:143099133:C:A | ◆  |
| 7q34-q35 | K 19  | rs10808026  | 7:143099133:C:A | ◆  |
|          | J 19  | rs7810606   | 7:143108158:T:C | ◆  |
|          | L 13  | rs11771145  | 7:143110762:G:A | ◆  |
|          | J 19  | rs114360492 | 7:145950029:C:T | ◆  |
| 7q35     | M 18  | rs4236673   | 8:27464929:A:G  | ◆  |
|          | J 19  | rs4236673   | 8:27464929:A:G  | ◆  |
|          | L 13  | rs9331896   | 8:27467686:C:T  | ◆  |
|          | K 19  | rs9331896   | 8:27467686:C:T  | ◆  |
| 10p14    | J 19  | rs11257238  | 10:11717397:T:C | ◆  |
|          | M 18  | rs7920721   | 10:11720308:A:G | ◆  |
|          | K 19  | rs7920721   | 10:11720308:A:G | ◆  |
| 11p11.2  | K 19  | rs3740688   | 11:47380340:G:T | ◆  |
|          | M 18  | rs12292911  | 11:47449072:G:A | ◆  |
|          | L 13  | rs10838725  | 11:47557871:T:C | ◆  |

LD between variants is displayed to show analogous variants in a given locus. Purple squares are the same variant, other pairs of variants on each chromosome arm are represented by squares with a gradient between red ( $R^2 = 1$ ) and white (independent;  $R^2 = 0$ ). chr:pos:ref:alt: Chromosome, base pair position, reference allele and alternate allele from human genome build 19. Study: first initial of first author and two digit year.

Table 1 (contd.)

| Locus          | Study | rsID        | chr:pos:ref:alt  | LD |
|----------------|-------|-------------|------------------|----|
| 11q12.2        | L 13  | rs983392    | 11:59923508:A:G  | ◆  |
|                | K 19  | rs7933202   | 11:59936926:A:C  | ◆  |
|                | J 19  | rs2081545   | 11:59958380:C:A  | ◆  |
|                | M 18  | rs1582763   | 11:60021948:G:A  | ◆  |
| 11q14.2        | J 19  | rs867611    | 11:85776544:G:A  | ◆  |
|                | L 13  | rs10792832  | 11:85867875:A:G  | ◆  |
|                | M 18  | rs10792832  | 11:85867875:A:G  | ◆  |
|                | K 19  | rs3851179   | 11:85868640:T:C  | ◆  |
| 11q24.1        | L 13  | rs11218343  | 11:121435587:T:C | ◆  |
|                | M 18  | rs11218343  | 11:121435587:T:C | ◆  |
|                | J 19  | rs11218343  | 11:121435587:T:C | ◆  |
|                | K 19  | rs11218343  | 11:121435587:T:C | ◆  |
| 14q22.1        | M 18  | rs17125924  | 14:53391680:A:G  | ◆  |
|                | K 19  | rs17125924  | 14:53391680:A:G  | ◆  |
|                | L 13  | rs17125944  | 14:53400629:T:C  | ◆  |
| 14q32.12       | L 13  | rs10498633  | 14:92926952:G:T  | ◆  |
|                | K 19  | rs12881735  | 14:92932828:T:C  | ◆  |
|                | M 18  | rs12590654  | 14:92938855:G:A  | ◆  |
|                | J 19  | rs12590654  | 14:92938855:G:A  | ◆  |
| 15q21.2        | M 18  | rs59685680  | 15:51001534:T:G  | ◆  |
| 15q21.3        | J 19  | rs442495    | 15:59022615:T:C  | ◆  |
|                | M 18  | rs593742    | 15:59045774:A:G  | ◆  |
|                | K 19  | rs593742    | 15:59045774:A:G  | ◆  |
| 15q22.2        | J 19  | rs117618017 | 15:63569902:C:T  | ◆  |
| 16p12.3        | K 19  | rs7185636   | 16:19808163:T:C  | ◆  |
| 16p11.2        | M 18  | rs889555    | 16:31122571:C:T  | ◆  |
|                | J 19  | rs59735493  | 16:31133100:G:A  | ◆  |
| 16q22.1        | M 18  | rs4985556   | 16:70694000:C:A  | ◆  |
| 16q23.2        | K 19  | rs62039712  | 16:79355857:G:A  | ◆  |
| 16q23.3        | M 18  | rs12444183  | 16:81773209:A:G  | ◆  |
| 17p13.2        | M 18  | rs7225151   | 17:5137047:G:A   | ◆  |
|                | J 19  | rs113260531 | 17:5138980:G:A   | ◆  |
| 17q21.33       | J 19  | rs28394864  | 17:47450775:G:A  | ◆  |
| 17q22          | J 19  | rs2526380   | 17:56398006:C:G  | ◆  |
| 17q23.3        | M 18  | rs138190086 | 17:61538148:G:A  | ◆  |
|                | K 19  | rs138190086 | 17:61538148:G:A  | ◆  |
| 18q21.31       | J 19  | rs76726049  | 18:56189459:T:C  | ◆  |
| 19p13.3        | J 19  | rs111278892 | 19:1039323:C:G   | ◆  |
|                | M 18  | rs3752231   | 19:1043638:C:T   | ◆  |
|                | K 19  | rs3752246   | 19:1056492:G:C   | ◆  |
|                | L 13  | rs4147929   | 19:1063443:A:G   | ◆  |
| 19q13.32       | L 13  | rs41289512  | 19:45351516:C:G  | ◆  |
|                | M 18  | rs41289512  | 19:45351516:C:G  | ◆  |
|                | J 19  | rs41289512  | 19:45351516:C:G  | ◆  |
|                | K 19  | rs12691088  | 19:45418486:G:A  | ◆  |
| 19q13.41       | J 19  | rs3865444   | 19:51727962:C:A  | ◆  |
|                | M 18  | rs12459419  | 19:51728477:C:T  | ◆  |
| 20q13.2-q13.31 | M 18  | rs6069736   | 20:54983075:C:T  | ◆  |
|                | K 19  | rs6024870   | 20:54997568:G:A  | ◆  |
|                | J 19  | rs6014724   | 20:54998544:A:G  | ◆  |
|                | L 13  | rs7274581   | 20:55018260:T:C  | ◆  |
| 21q21.3        | K 19  | rs2830500   | 21:28156856:C:A  | ◆  |
